# Supplementary material for: Impact of Surgeon cadre, theatre location, and presence of intern healthcare professionals on decision-to-delivery interval in women undergoing emergency caesarean section in Northern Uganda: a historical cohort study
Source: Research Square preprint supplement (doi:10.21203/rs.3.rs-6491008/v1), 2026-02-03
Supplement: Supplementary file 1 [file b36a00bc2bcd82d75ea94433.docx]

**Additional file 1**

**Table 4: Adjusted analysis for predictors of prolonged DDI stratified by emergency CS indication**

| Indications of emergency CS | Exposure variables | % Prolonged DDI  (cases/n) | Strata-specific OR  (95% CI) | p-valueꝉ |
| --- | --- | --- | --- | --- |
|  | **Surgeon’s cadre** |  |  |  |
| Previous CS | Junior doctor | 49.1 (28/57) | 1 | 0.83 |
| Senior doctor | 33.3 (72/216) | 1.86 (0.99-3.49)c |
| Foetal distress | Junior doctor | 55.3 (26/47) | 1 |
| Senior doctor | 26.3 (10/38) | 2.59 (1.00-6.70)c |
| Obstructed labour | Junior doctor | 55.9 (19/34) | 1 |
| Senior doctor | 27.6 (27/98) | 2.88 (1.24-6.71)c |
| Others | Junior doctor | 45.2 (14/31) | 1 |
| Senior doctor | 31.1 (27/151) | 1.64 (0.71-3.77)c |
|  | **Theatre** |  |  |  |
| Previous CS | Main | 38.2 (87/228) | 1 | 0.47 |
| Labour-suite | 30.0 (18/60) | 0.72 (0.38-1.34)d |
| Foetal distress | Main | 36.6 (26/71) | 1 |
| Labour-suite | 48.2 (26/54) | 1.41 (0.68-2.94)d |
| Obstructed labour | Main | 33.3 (39/117) | 1 |
| Labour-suite | 25.5 (11/31) | 0.97 (0.42-2.25)d |
| Others | Main | 34.9 (58/166) | 1 |
| Labour-suite | 27.3 (9/33) | 0.65 (0.28-1.53)d |
|  | **Presence of interns** |  |  |  |
| Previous CS | Present | 39.1 (75/192) | 1 | 0.88 |
| Absent | 31.58 (30/95) | 0.72 (0.43-1.21)b |
| Foetal distress | Present | 41.5 (49/118) | 1 |
| Absent | 42.9 (3/7) | 1.10 (0.24-5.17)b |
| Obstructed labour | Present | 36.5 (42/115) | 1 |
| Absent | 24.2 (8/33) | 0.56 (0.23-1.37)b |
| Others | Present | 34.7 (50/144) | 1 |
| Absent | 29.6 (16/54) | 0.80 (0.41-1.58)b |

**Abbreviations:** DDI, decision-to-delivery interval; OR, odds ratio; CI, confidence interval.

**ꝉ**Likelihood ratio p-values

aWomen without any delays documented 138 (18.2%) excluded to overcome zero cells when assessing point of delay-prolonged DDI association

bOdds ratio adjusted for maternal age, presence of juniors, gestational age groups, cadre of the surgeon, parity group, type of anaesthesia, staff shift, calendar day of the week, and area of residence (N=412).

cOdds ratio adjusted for maternal age, parity group, presence of interns, operation day, and staff shift (N=667).

dOdds ratio adjusted for maternal age, parity group, area of residence, and operation day (N=755).

*****Percentages may not add up to 100.0% due to rounding and missing data.

**Table 5: Adjusted associations between surgeons’ cadre, theatre location, and interns’ presence and prolonged DDI.**

| Variable |  | OR  (95% CI)b | p-value | OR  (95% CI) | p-valueꝉ |
| --- | --- | --- | --- | --- | --- |
| Surgeon’s cadreꝉ | Senior doctor | 1 | <0.0001 | 1 | 0.002 |
| Junior | 2.35 (1.64-3.36) | 2.00 (1.30-3.09)d |
| Theatre | Main | 1 | 0.91 | 1 | 0.67 |
| Labour-suite | 0.98 (0.69-1.39) | 0.91 (0.59-1.41)e |

**Abbreviations:** DDI, decision-to-delivery interval; OR, odds ratio; CI, confidence interval.

**ꝉ**Likelihood ratio p-values

bOdds ratio adjusted for maternal age

cOdds ratio adjusted for maternal age, presence of juniors, indication of emergency caesarean section, cadre of the surgeon, parity group, staff shift, operation day, and area of residence (N=555).

dOdds ratio adjusted for maternal age, parity group, presence of interns, gestational age, operation day, and staff shift (N=487).

eOdds ratio adjusted for maternal age, parity group, gestational age, indication of emergency caesarean section, area of residence, and operation day (N=559).
